# Supplementary material
Source: Springer Nature journal article supplement (https://www.springermedizin.de/resource/supplementary/12958_2005_289_MOESM4_ESM.pdf/9567690)

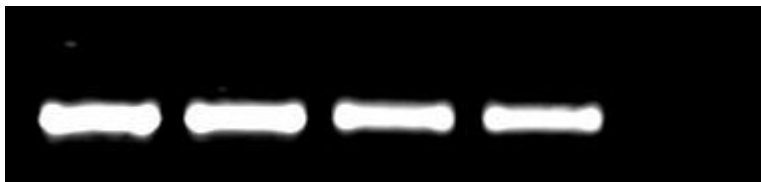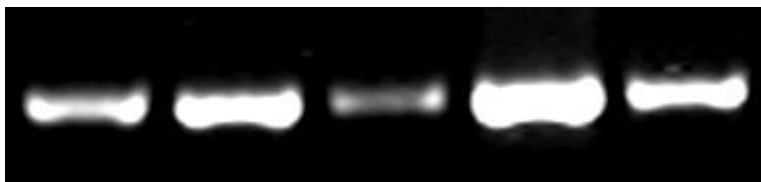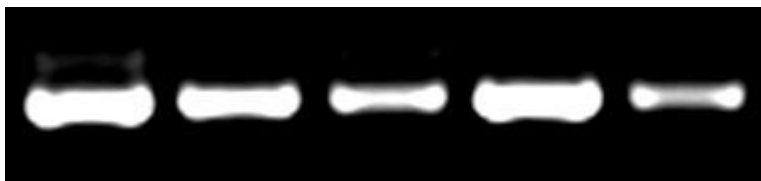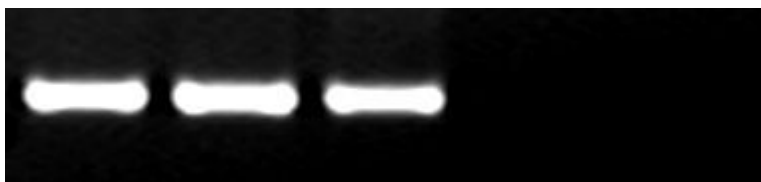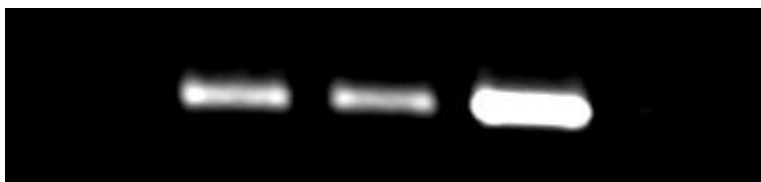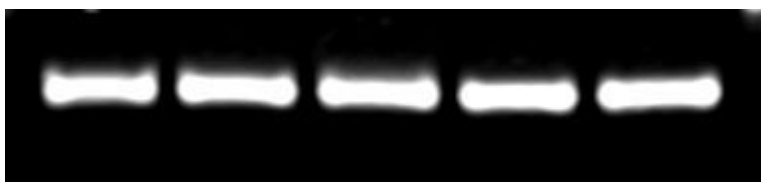

Caput    Corpus    Cauda    Testis    Seminal Vesicle

Supplement: MOESM4 [file 9567690]
